# Supplementary material for: Preparation of ultrathin perovskite nanosheets by the exfoliation of H2CaTa2O7 for high-performance lead removal from water
Source: Royal Society of Chemistry journal article supplement (doi:10.1039/c6ra21891a), 2016-01-01
Supplement: c6ra21891a1.pdf [file c6ra21891a1.pdf]

## Supporting Information

### **Preparation of Ultrathin Perovskite Nanosheets by Exfoliation of $\text{H}_2\text{CaTa}_2\text{O}_7$ for High-Performance Lead Removal from Waters**

Yan Wang<sup>a,b</sup>, Yi Ren<sup>a</sup>, Jingjing Luo<sup>a</sup>, Qiaoyan Hao<sup>a</sup>, Biao Li<sup>a</sup>, Zhan Gao<sup>a</sup>, Yiwei Hu<sup>a</sup>, Dan Lin<sup>a</sup>,  
Kaibin Tang<sup>\*a</sup>

<sup>a</sup>Division of Nanomaterials and Chemistry, Hefei National Laboratory for Physical Sciences at the  
Microscale, Department of Chemistry, University of Science and Technology of China, Hefei,  
230026, P.R. China.

<sup>b</sup>State Key Laboratory of Pulsed Power Laser Technology, Electronic Engineering Institute, 460  
Huangshan Road, Hefei, Anhui, 230037, P.R. China

Article

Submitted to RSC Adv.

\* Corresponding author. Tel.: + 86-551-63601791; fax: +86-551-63607402

E-mail address: kbtang@ustc.edu.cn;

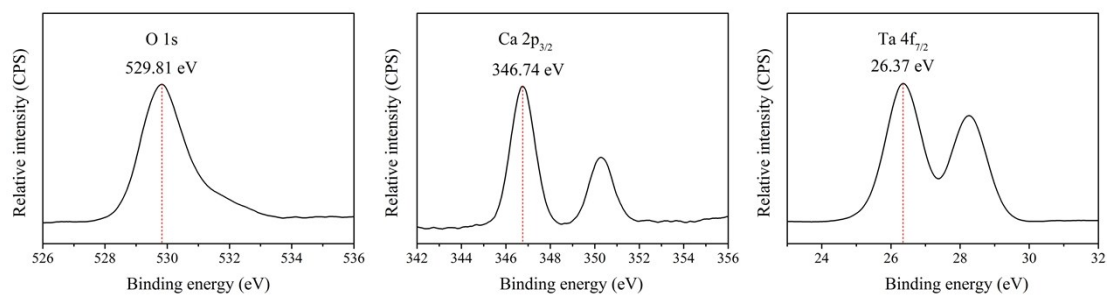

**Figure S1.** XPS spectra of sample U-HCT-Pb after washing with HCl.

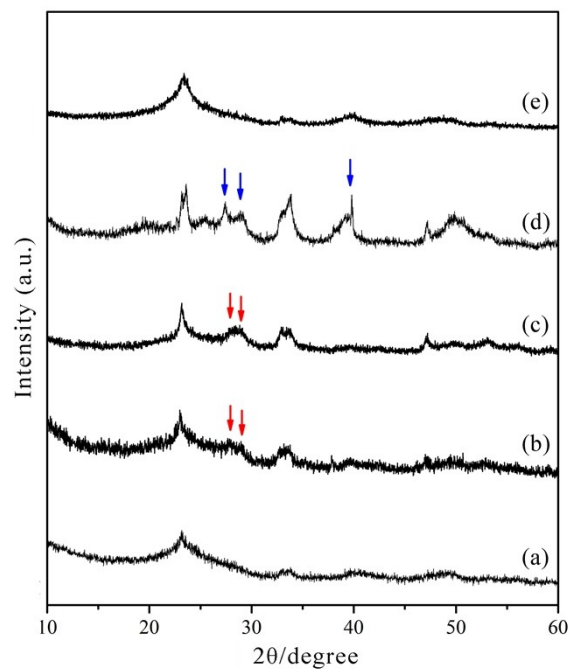

**Figure S2.** The XRD patterns of U-HCT sample in different state: (a) U-HCT; (b) U-HCT after uptake Pb(II) at pH 1.3; (c) U-HCT after uptake Pb(II) at pH 5.0; (d) U-HCT after uptake Pb(II) at pH 6.8; (e) U-HCT after uptake Pb(II), 1 M HCl solution washed repeatedly.

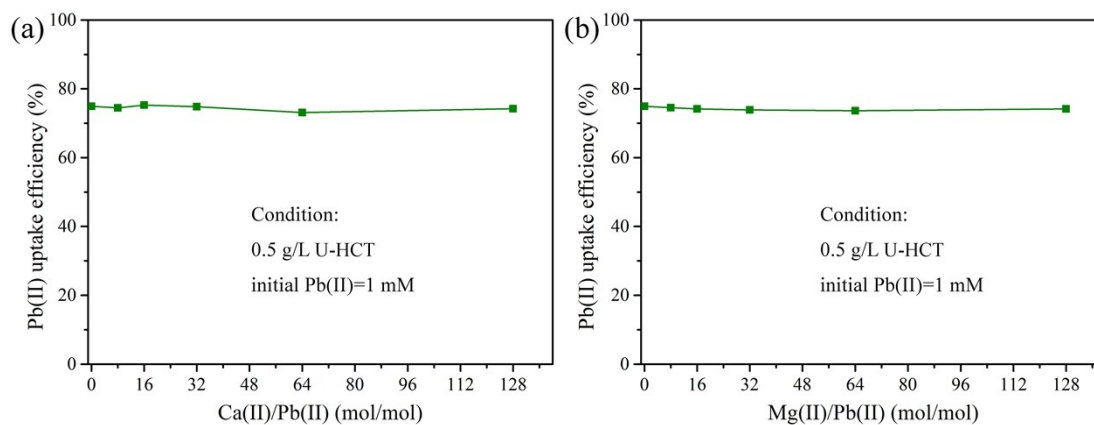

**Figure S3.** Effect of competitive ions on uptake of lead ions onto U-HCT (a) calcium ions, (b) magnesium ions.

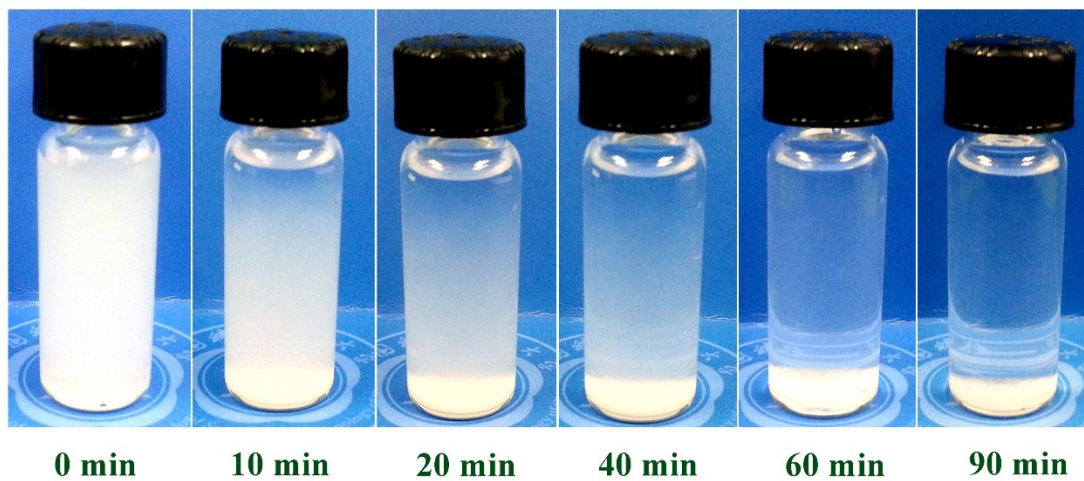

**Figure S4.** Static settling properties in various time intervals of U-HCT with adsorbed lead ions (initial Pb(II) concentration is 300 m/L).
